# Supplementary material for: Photoisomerization of azobenzene units drives the photochemical reaction cycles of proteorhodopsin and bacteriorhodopsin analogues
Source: Royal Society of Chemistry journal article supplement (doi:10.1039/d0ob01486a), 2020-01-01
Supplement: d0ob01486a1.pdf [file d0ob01486a1.pdf]

## Electronic Supplementary information (ESI) for

### **Photoisomerization of azobenzene units drives the photochemical reaction cycles of proteorhodopsin and bacteriorhodopsin analogues**

Shariful Haque<sup>1,2</sup>, Takashi Kikukawa<sup>3,4</sup> and Nobuyuki Tamaoki<sup>1,2\*</sup>

1. Research Institute for Electronic Science, Hokkaido University, Kita 20, Nishi 10, Kita-ku, Sapporo, Japan

2. Graduate School of Life Science, Hokkaido University, Kita 10, Nishi 8, Kita-ku, Sapporo, Japan

3. Faculty of Advanced Life Science, Hokkaido University, Sapporo, 060-0810, Japan

4. Global Station for Soft Matter, Global Institution for Collaborative Research and Education, Hokkaido University, Sapporo, 001-0021, Japan

\* Correspondence and request for materials should be addressed to N. Tamaoki

(E-mail: [tamaoki@es.hokudai.ac.jp](mailto:tamaoki@es.hokudai.ac.jp))

## Table of Contents

|     |                                                                                                                  |     |
|-----|------------------------------------------------------------------------------------------------------------------|-----|
| 1.  | List of chromophores and proteins tested in this study.                                                          | S3  |
| 2.  | Photographs of POP expressed, and unexpressed <i>E. coli</i> cells incubated with azo chromophores Az I and Az I | S4  |
| 3.  | Flash-photolysis experimental and simulated curves of Az II and PAz II                                           | S5  |
| 4.  | UV-vis absorption spectra of Az II bound POP mutant proteins                                                     | S6  |
| 5.  | Photoinduced proton transfer reaction signals of Az II bound POP and POP mutant proteins                         | S7  |
| 6.  | Flash photolysis curves of PAz II-D97N, PAz II-D227N, and PAz II-E108Q at different wavelengths                  | S8  |
| 7.  | Flash photolysis experimental and simulated curves of BAz II at different wavelengths                            | S9  |
| 8.  | Fitting parameters of flash-photolysis data of PAz II                                                            | S10 |
| 9.  | Fitting parameters of flash-photolysis data of BAz II                                                            | S11 |
| 10. | NMR Spectral data                                                                                                | S12 |
| 11. | High-resolution mass spectra data                                                                                | S16 |
| 12. | SDS-PAGE analysis of proteins                                                                                    | S18 |

**1. List of chromophores and proteins used in this study.**

**Table S1. List of chromophores and proteins used in this study.**

| <b>Chromophores</b> | <b>Proteins</b> |             |              |              |        |
|---------------------|-----------------|-------------|--------------|--------------|--------|
| Az I                | PAz I           | PAz I-D97N  | PAz I-E108Q  | PAz I-D227N  | BAz I  |
| Az II               | PAz II          | PAz II-D97N | PAz II-E108Q | PAz II-D227N | BAz II |
| Retinal             | PR              |             |              |              | BR     |

2. Photographs of POP expressed, and unexpressed *E. coli* cells incubated with azo chromophores Az I and Az II

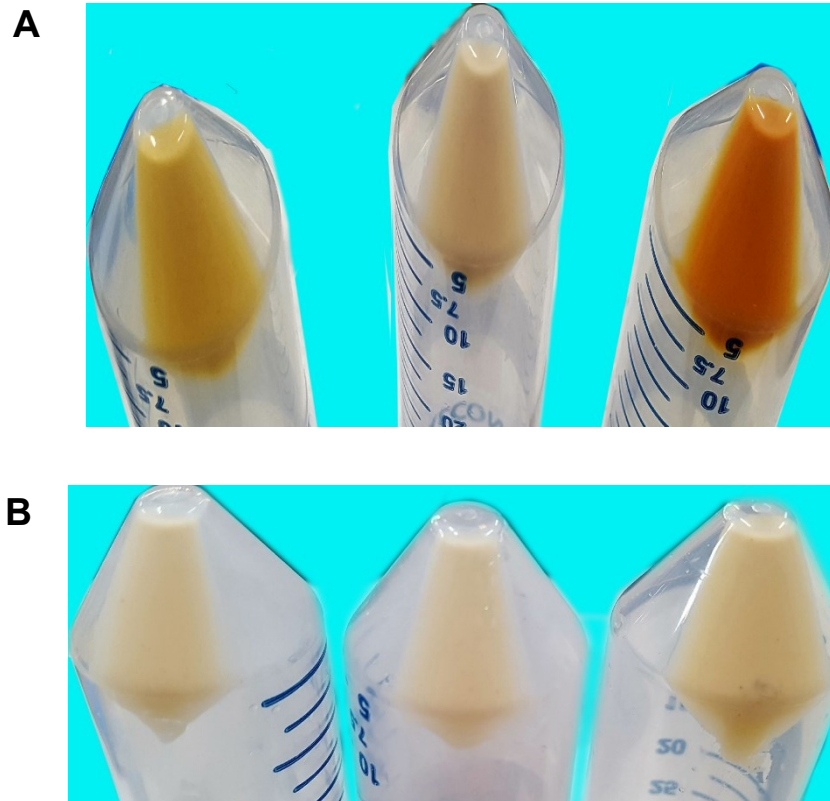

**Fig. S1 A.** Photographs of POP-expressed *E. coli* cells solids incubated with azo chromophore Az I (left) and Az II (right) and without azo chromophore (middle). **B.** Photograph of POP-unexpressed *E. coli* cells solids incubated with azo chromophores Az I (left) and Az II (right) and without azo chromophore (middle).

### 3. Flash-photolysis experimental and simulated curves of Az II and PAz II

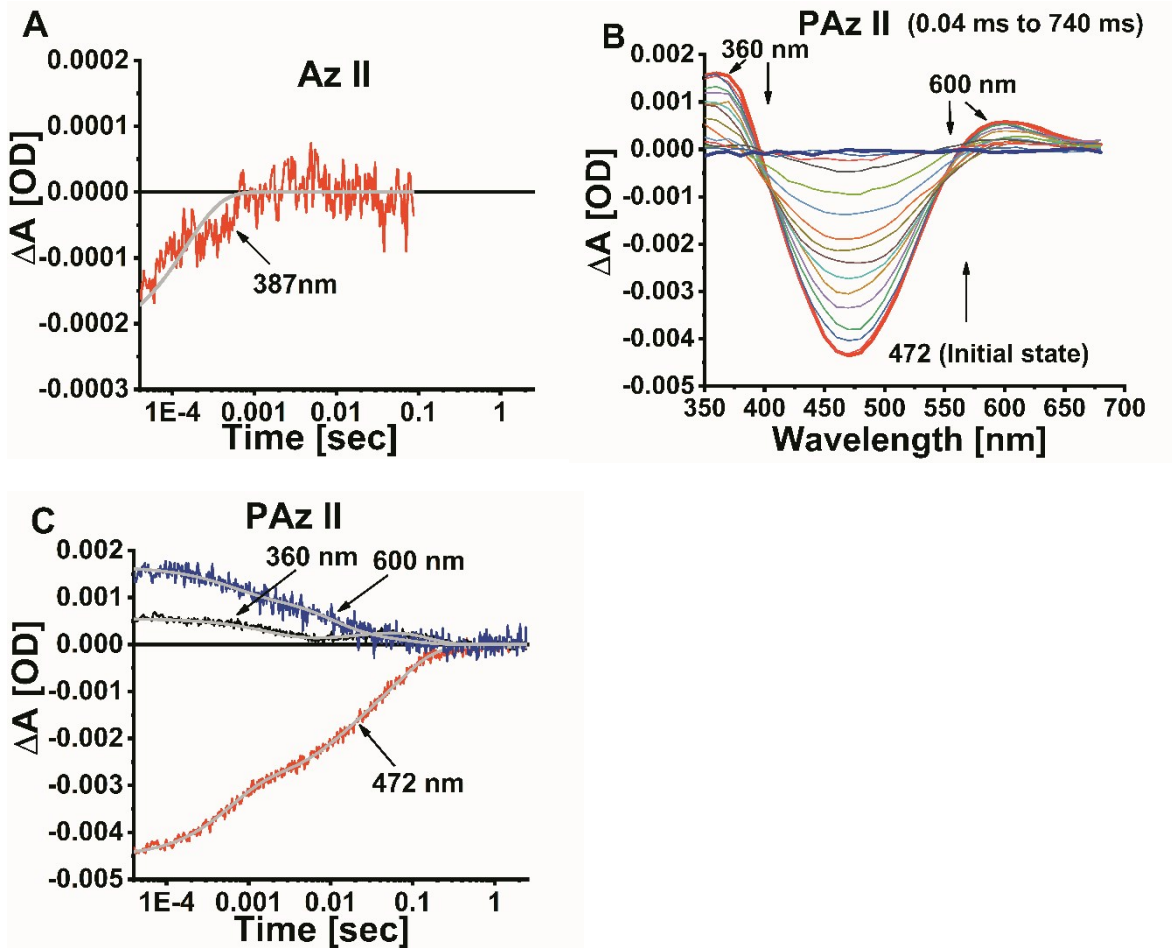

**Fig. S2 A.** Experimental (red) and simulated (light gray) flash-photolysis curves at  $\lambda_{\max}$  of Az II. **B.** Flash-induced light-minus-dark difference absorption spectra of PAz II over the spectral range 350-700 nm and the time range of 0.04-740.0 ms. Herein red and black lines represent the spectra at 0.04 and 740.0 ms, respectively. The direction of the evolution of the spectral changes are indicated by arrows. **C.** Experimental and simulated flash photolysis curves at three characteristic wavelengths (360 nm, 472 nm and 600 nm) of PAz II. Fitting curves are shown as light gray lines.

#### 4. UV-vis absorption spectra of Az II bound POP mutant proteins

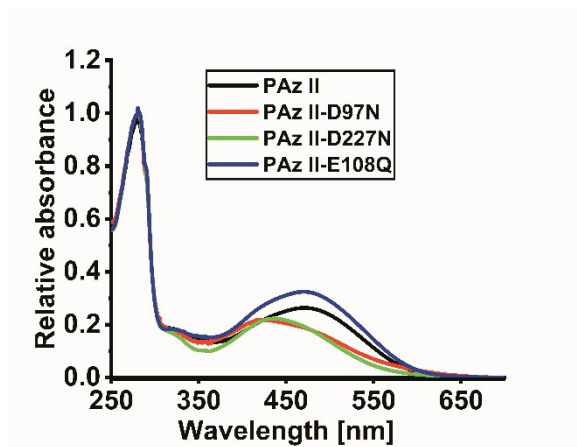

**Fig. S3** UV-vis absorption spectra of PAz II (black), PAz II-D97N (red), PAz II-D227N (green), and PAz II-E108Q (blue).

## 5. Photoinduced proton transfer reaction signals of Az II bound POP and POP mutant proteins

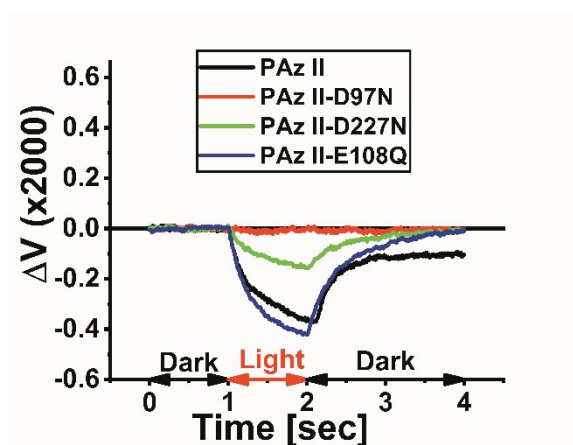

**Fig. S4** Change in the signals for photoinduced proton transfer reaction of PAz II (blank), PAz II-D97N (red), PAz II-D227N (green), and PAz II-E108Q (blue).

6. Flash photolysis curves of PAz II-D97N, PAz II-D227N and PAz II-E108Q at different wavelengths

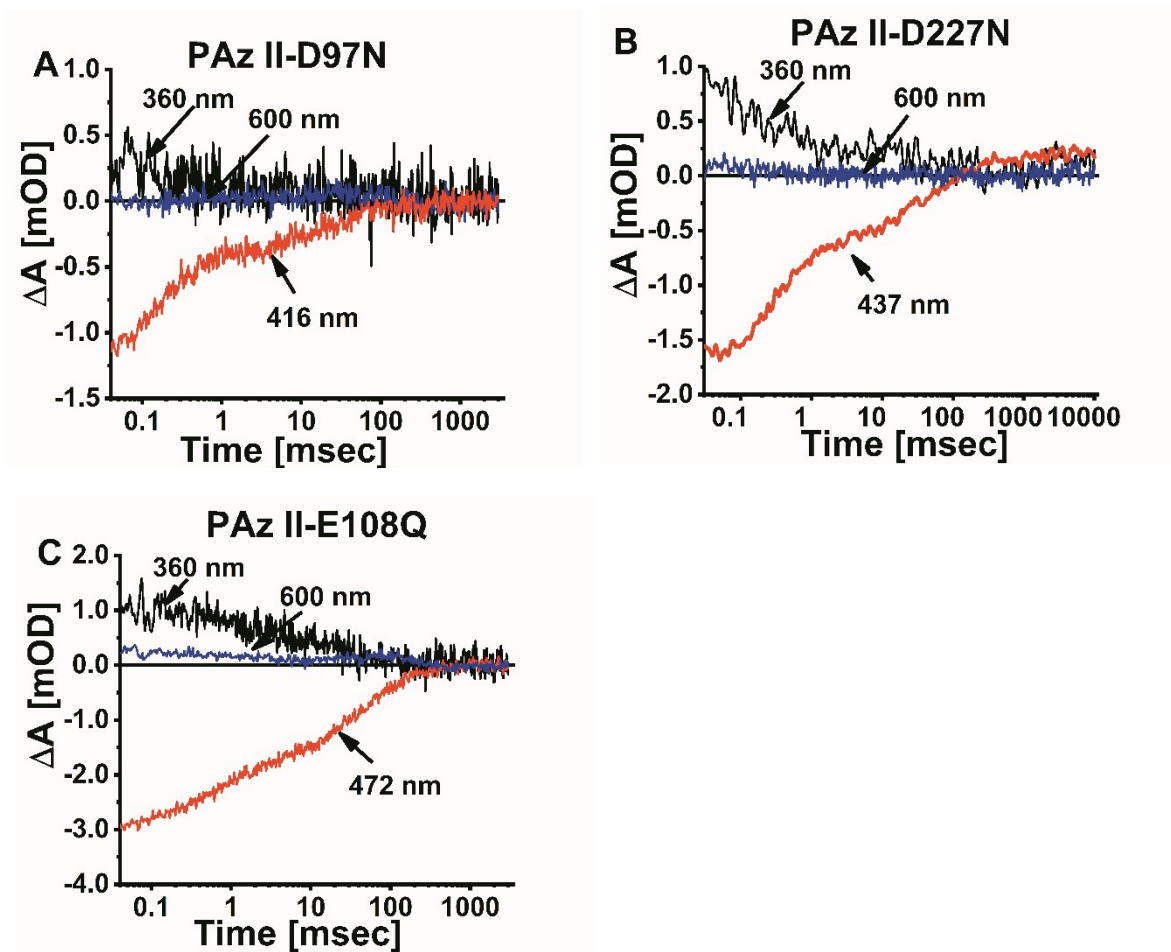

**Fig. S5** Flash-induced absorbance changes at three characteristic wavelengths of (A) PAz II-D97N, (B) PAz II-D227N, and (C) PAz II-E108Q.



## 7. Flash photolysis experimental and simulated curves of BAz II at different wavelengths

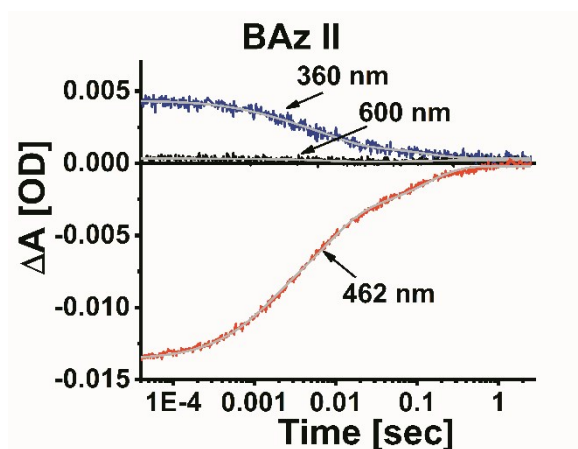

**Fig. S6** Experimental and simulated flash photolysis curves at three wavelengths (360, 462, and 600 nm) of BAz II. Fitting curves are provided in light gray.

## 8. Fitting parameters of flash photolysis data of PAz II

**Table S2** Fitting parameters of the flash photolysis data of PAz II recorded at 472, 360, and 600 nm.

| Wave-length<br>(nm) | $k_1$ (s <sup>-1</sup> )     | $k_2$ (s <sup>-1</sup> ) | $k_3$ (s <sup>-1</sup> ) | $\epsilon^{P_1}$<br>(M <sup>-1</sup> cm <sup>-1</sup> ) | $\epsilon^{P_2}$<br>(M <sup>-1</sup> cm <sup>-1</sup> ) | $\epsilon^{P_3}$<br>(M <sup>-1</sup> cm <sup>-1</sup> ) | $\epsilon^{P_0}$<br>(M <sup>-1</sup> cm <sup>-1</sup> ) | RSS                   |
|---------------------|------------------------------|--------------------------|--------------------------|---------------------------------------------------------|---------------------------------------------------------|---------------------------------------------------------|---------------------------------------------------------|-----------------------|
| 472                 | $1.77 \times 10^3 \pm 62.22$ | $102.0 \pm 11.2$<br>4    | $14.72 \pm 0.5$<br>9     | $130.8 \pm 44.77$                                       | $7.69 \times 10^3 \pm 121.96$                           | $1.33 \times 10^4 \pm 367.50$                           | $2.12 \times 10^4 \pm 37.14$                            | $3.12 \times 10^{-6}$ |
| 360                 | $1.77 \times 10^3$           | 102.0                    | 14.72                    | $7.78 \times 10^3 \pm 93.92$                            | $4.88 \times 10^3 \pm 94.51$                            | $1.18 \times 10^3 \pm 116.97$                           | $14.40 \pm 6.37$                                        | $1.05 \times 10^{-6}$ |
| 600                 | $1.77 \times 10^3$           | 102.0                    | 14.72                    | $2.96 \times 10^3 \pm 50.77$                            | $1.25 \times 10^3 \pm 51.08$                            | $991.0 \pm 63.23$                                       | $220.1 \pm 32.75$                                       | $3.04 \times 10^{-6}$ |

## 9. Fitting parameters of flash-photolysis data of BAz II

**Table S3** Fitting parameters of the flash photolysis data of BAz II recorded at 462, 360, and 600 nm.

| Wave-length (nm) | $k_1$ (s <sup>-1</sup> ) | $k_2$ (s <sup>-1</sup> ) | $k_3$ (s <sup>-1</sup> ) | $\epsilon P_1$ (M <sup>-1</sup> cm <sup>-1</sup> ) | $\epsilon P_2$ (M <sup>-1</sup> cm <sup>-1</sup> ) | $\epsilon P_3$ (M <sup>-1</sup> cm <sup>-1</sup> ) | $\epsilon P_0$ (M <sup>-1</sup> cm <sup>-1</sup> ) | RSS                     |
|------------------|--------------------------|--------------------------|--------------------------|----------------------------------------------------|----------------------------------------------------|----------------------------------------------------|----------------------------------------------------|-------------------------|
| <b>462</b>       | 879.3<br>± 40.4<br>1     | 127.1<br>±<br>5.01       | 8.01<br>± 0.3<br>0       | 614.5<br>± 28.15                                   | 8.39 ×<br>10 <sup>3</sup><br>± 239.56              | 1.74 ×<br>10 <sup>4</sup><br>± 104.36              | 2.24 ×<br>10 <sup>4</sup><br>± 32.48               | 1.59 × 10 <sup>-6</sup> |
| <b>360</b>       | 879.3                    | 127.1                    | 8.01                     | 7.05 ×<br>10 <sup>3</sup><br>± 33.98               | 5.06 ×<br>10 <sup>3</sup><br>± 64.57               | 1.93 ×<br>10 <sup>3</sup><br>± 53.26               | 549.3<br>± 37.23                                   | 1.59 × 10 <sup>-6</sup> |
| <b>600</b>       | 879.3                    | 127.1                    | 8.01                     | 509.5<br>± 21.91                                   | 478.8<br>± 41.64                                   | 132.4<br>± 34.34                                   | 334.3<br>± 24.00                                   | 1.31 × 10 <sup>-6</sup> |

## 10. NMR Spectral data

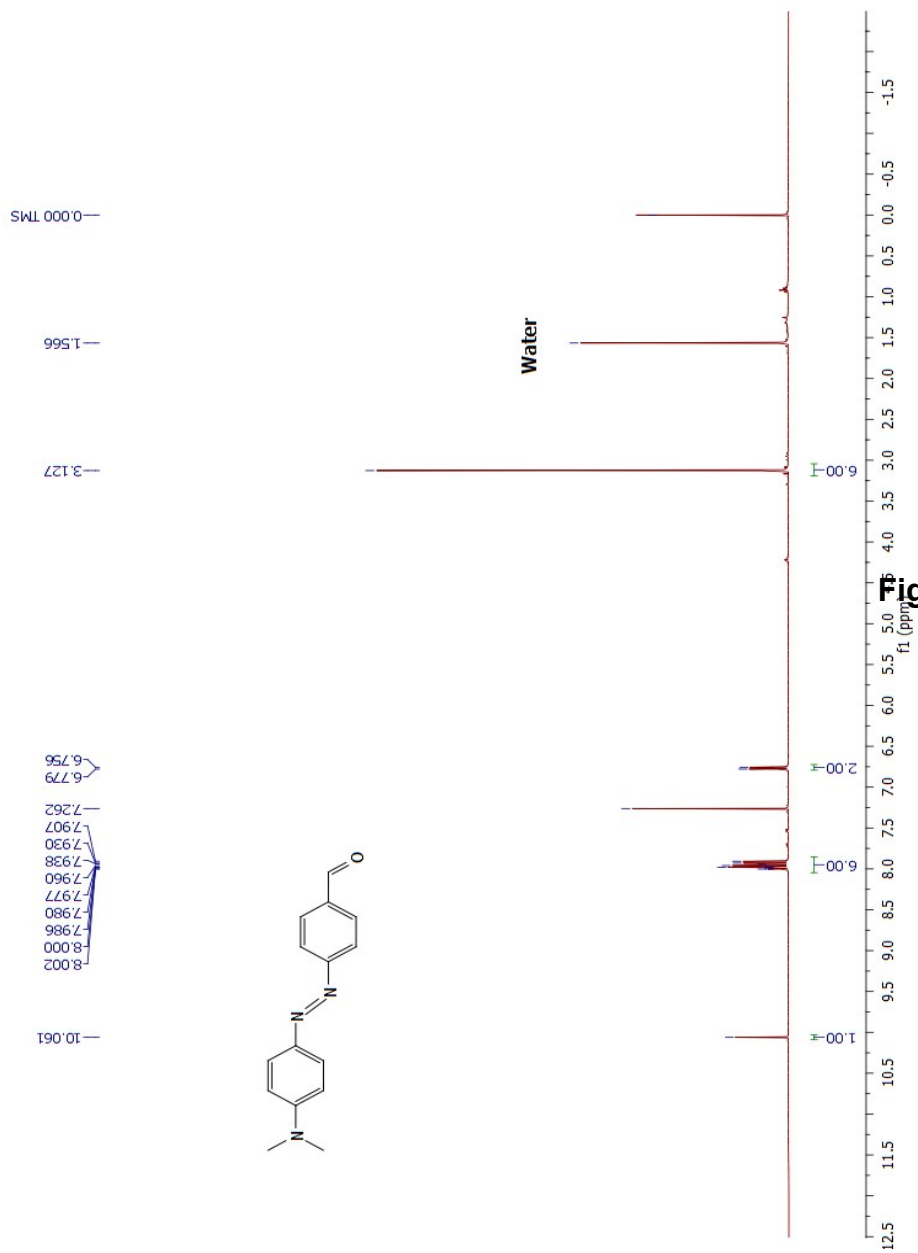

Fig. S7 <sup>1</sup>H NMR of Az I

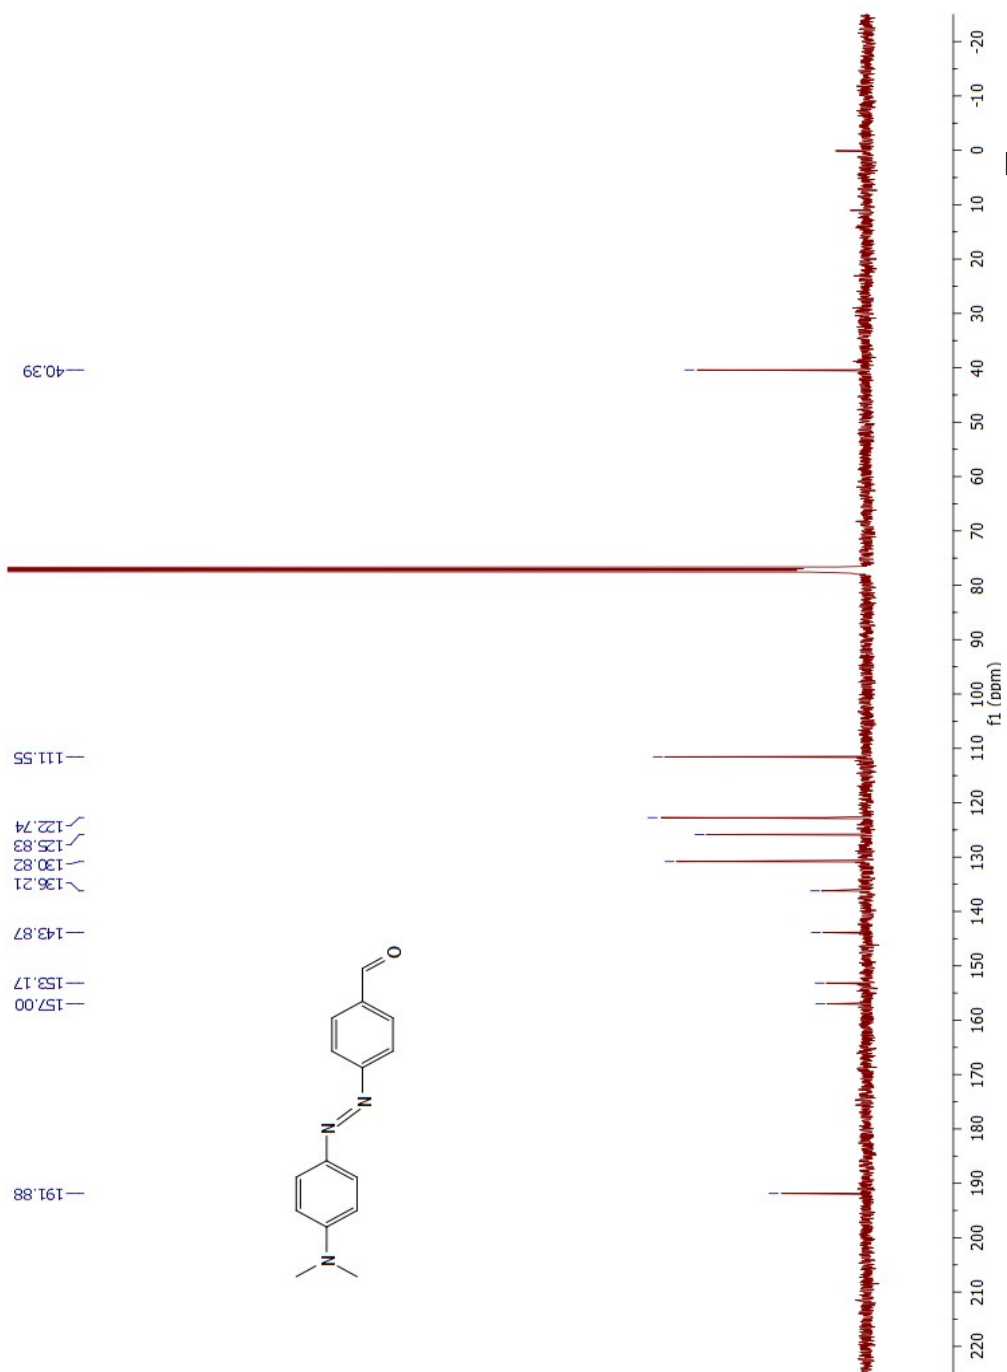

**Fig. S8**  $^{13}\text{C}$  NMR of Az I



S9 <sup>1</sup>H NMR of Az II

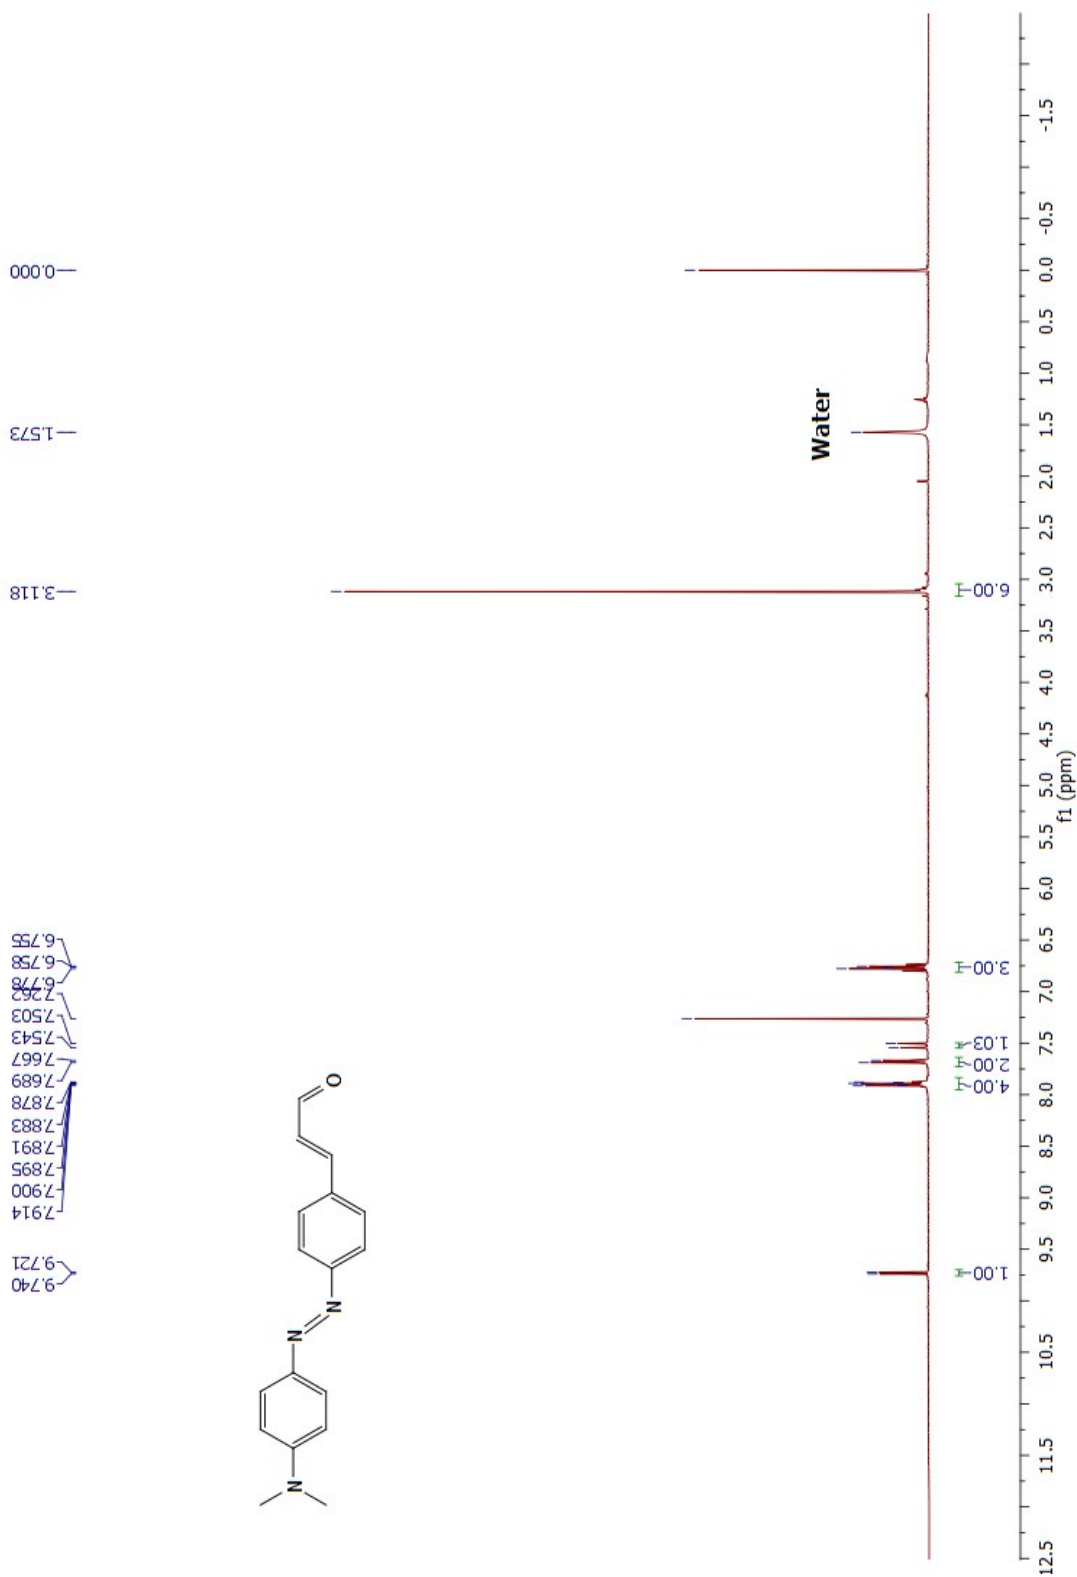

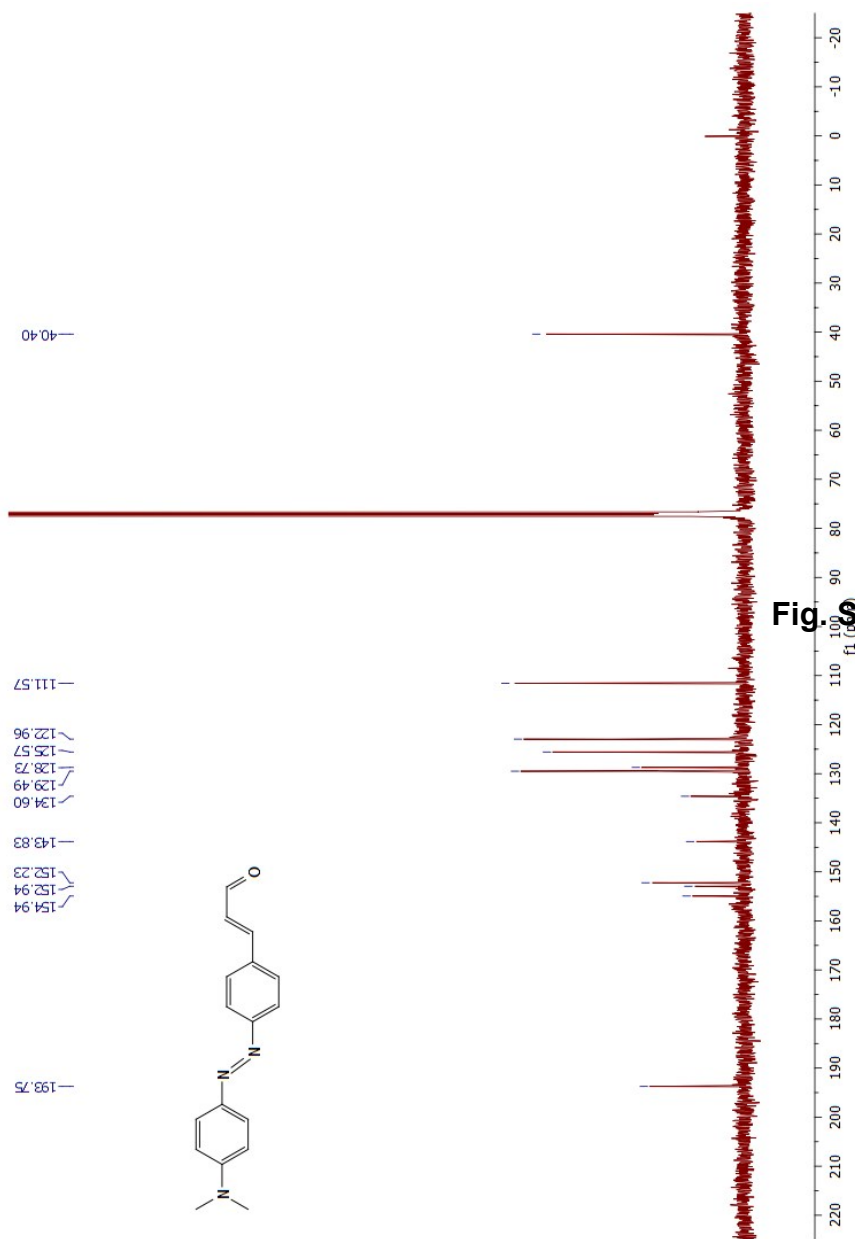

Fig. S10 <sup>13</sup>C NMR of Az II



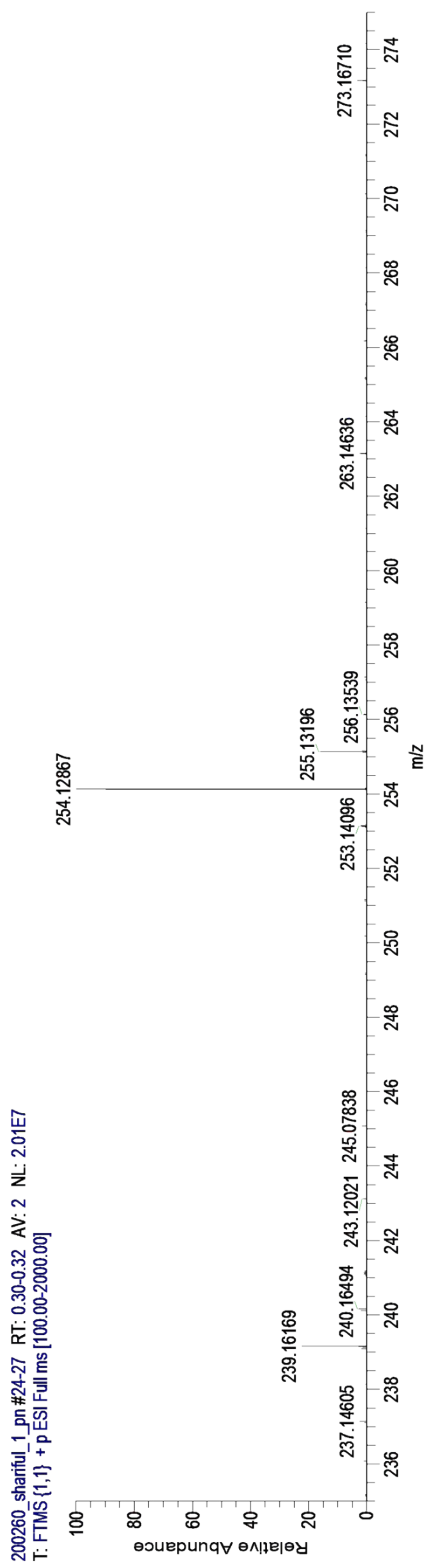

**Fig. S11** High-resolution mass spectra of Az I. Observed and theoretical MS for  $C_{15}H_{16}N_3O [M + H]^+$ : 254.12867 and 254.12879.

200259\_shariful\_2\_pn #25-27 RT: 0.29-0.32 AV: 2 NL: 1.08E7  
T: FTMS (1,1) + p ESI Full ms [100.00-2000.00]

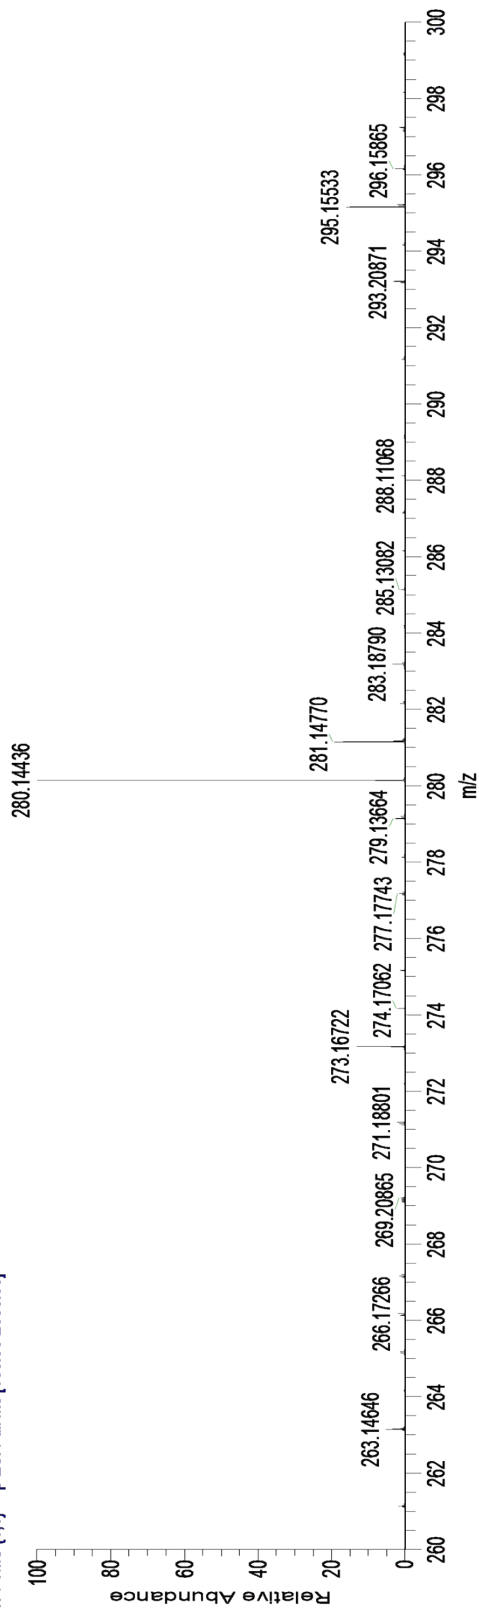

**Fig. S12**  
High-resolution mass spectra of Az II. Observed and theoretical MS for  $C_{17}H_{18}N_3O [M + H]^+$ :  
280.14436 and 280.14444.

## 12. SDS-PAGE analysis of proteins

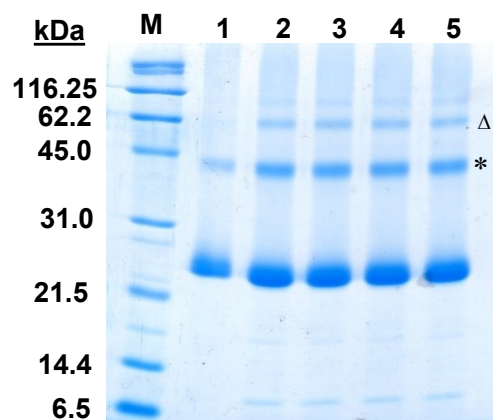

**Fig. S13** SDS-PAGE analysis of azo chromophore Az I analogues of wild-type POP and POP mutant proteins. Lane M, protein molecular weight maker. Lanes 1-5 gave bands for wild-type PR, PAz I, PAz I-D97N, PAz I-D227N and PAz I-E108Q respectively. \*, $\Delta$  SDS-PAGE bands might be due to the formation of dimer and trimer of POP.

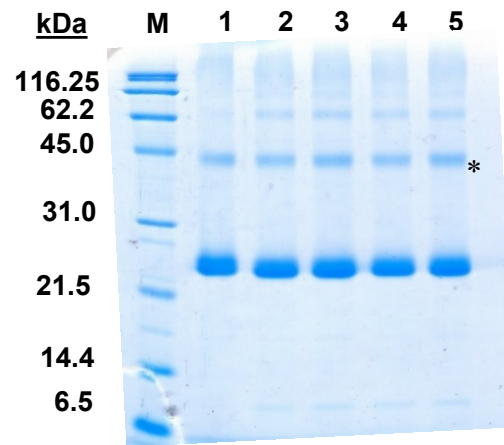

**Fig. S14** SDS-PAGE analysis of azo chromophore Az II analogues of wild-type POP and POP mutant proteins. Lane M, protein molecular weight maker. Lanes 1-5 gave band for wild-type PR, PAz II, PAz II-D97N, PAz II-D227N and PAz II-E108Q respectively. \* SDS-PAGE bands might be due to the formation of dimer of POP.

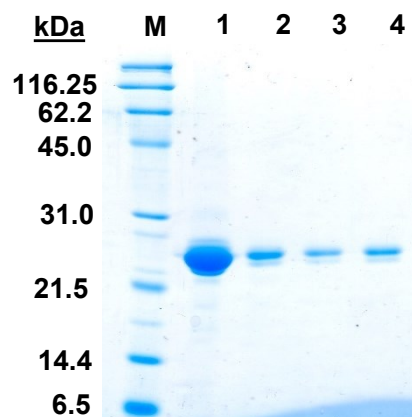

**Fig. S15** SDS-PAGE analysis of azo analogues of BR. Lane M, protein molecular weight maker. Lanes 1-4 gave bands for wild-type BR, BOP, BAz I and BAz II respectively.
